# Supplementary material for: Two pillared-layer metal–organic frameworks based on the pinwheel trinuclear carboxylate-clusters of Zn(ii) and Co(ii): synthesis, crystal structures, magnetic study, and Lewis acid catalysis
Source: Royal Society of Chemistry journal article supplement (doi:10.1039/d2dt04106e), 2022-12-30
Supplement: d2dt04106e1.pdf [file d2dt04106e1.pdf]

## Electronic Supplementary Information

### **Two pillared-layer metal-organic frameworks based on pinwheel trinuclear carboxylate-clusters of Zn(II) and Co(II): synthesis, crystal structures, magnetic study, and Lewis acid catalysis**

Moyna Das<sup>†a</sup>, Vishakha Jaswal<sup>†a</sup>, Himanshi Bhambri<sup>b</sup>, Prasenjit Das<sup>c</sup>, Suwendu Maity<sup>d</sup>, Prasanta Ghosh<sup>d</sup>, Sanjay K. Mandal<sup>b</sup> and Madhushree Sarkar<sup>\*a</sup>

<sup>a</sup>Department of Chemistry, Birla Institute of Technology and Science, Pilani, Pilani Campus, Rajasthan 333031 India. E-mail: [msarkar@pilani.bits-pilani.ac.in](mailto:msarkar@pilani.bits-pilani.ac.in)

<sup>b</sup>Department of Chemical Sciences, Indian Institute of Science Education and Research Mohali, Sector 81, S.A.S. Nagar, Punjab 140 306, India. E-mail: [sanjaymandal@iisermohali.ac.in](mailto:sanjaymandal@iisermohali.ac.in)

<sup>c</sup>Technische Universität Berlin, Department of Chemistry / Functional Materials, Hardenbergstr. 40, 10623 Berlin, [prasenjitsepistles@gmail.com](mailto:prasenjitsepistles@gmail.com)

<sup>d</sup>Department of Chemistry, Ramakrishna Mission Residential College, Narendrapur, Kolkata-700103, India. E-mail: [ghosh@pghosh.in](mailto:ghosh@pghosh.in)

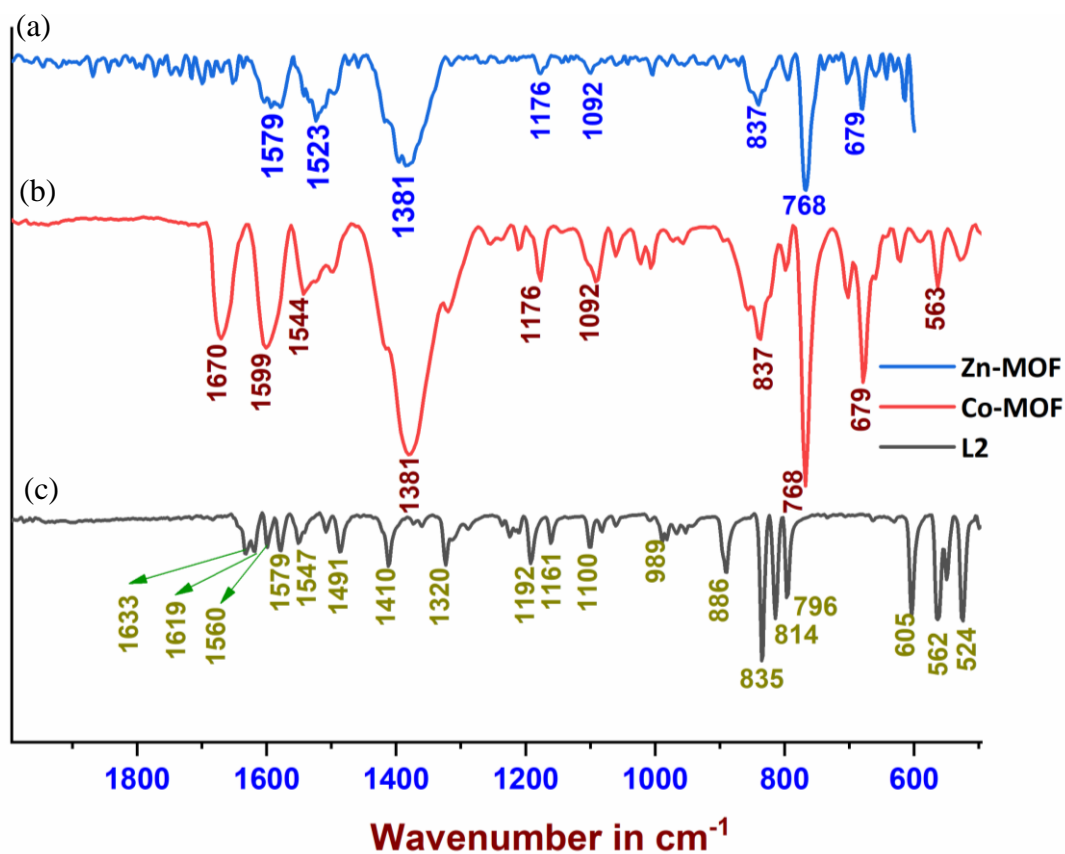

Fig. S1 FTIR spectra of (a) Zn-MOF, (b) Co-MOF and (c) L2.

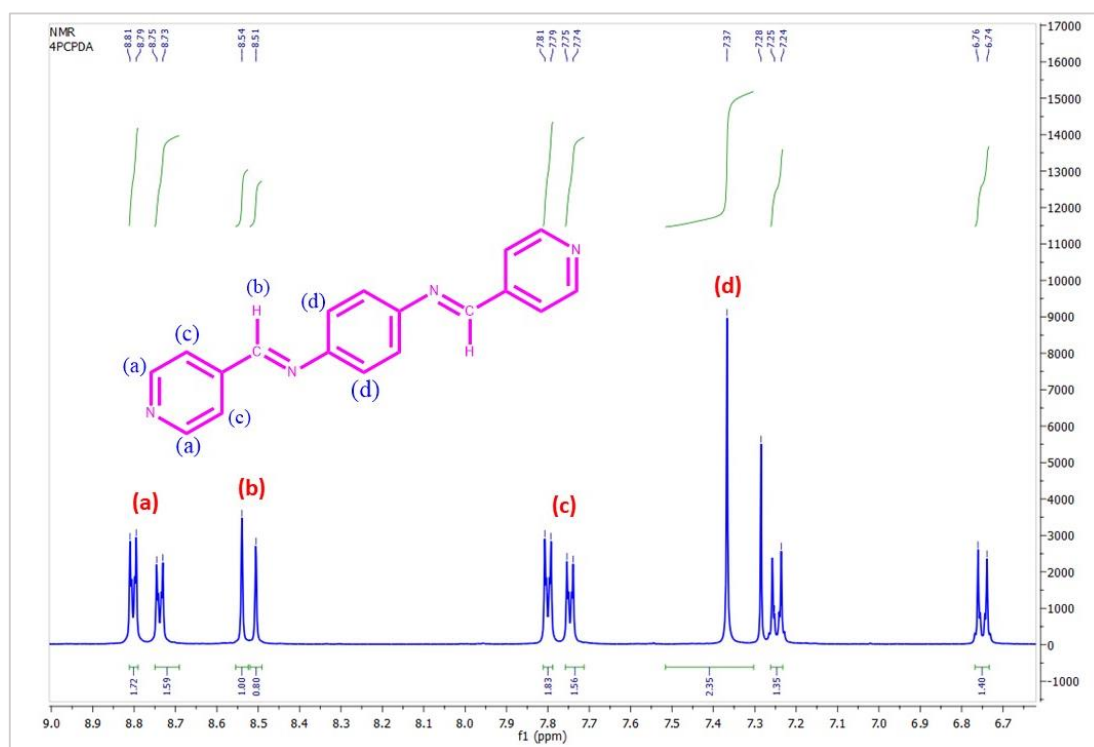

Fig. S2  $^1\text{H}$  NMR spectrum of L2.

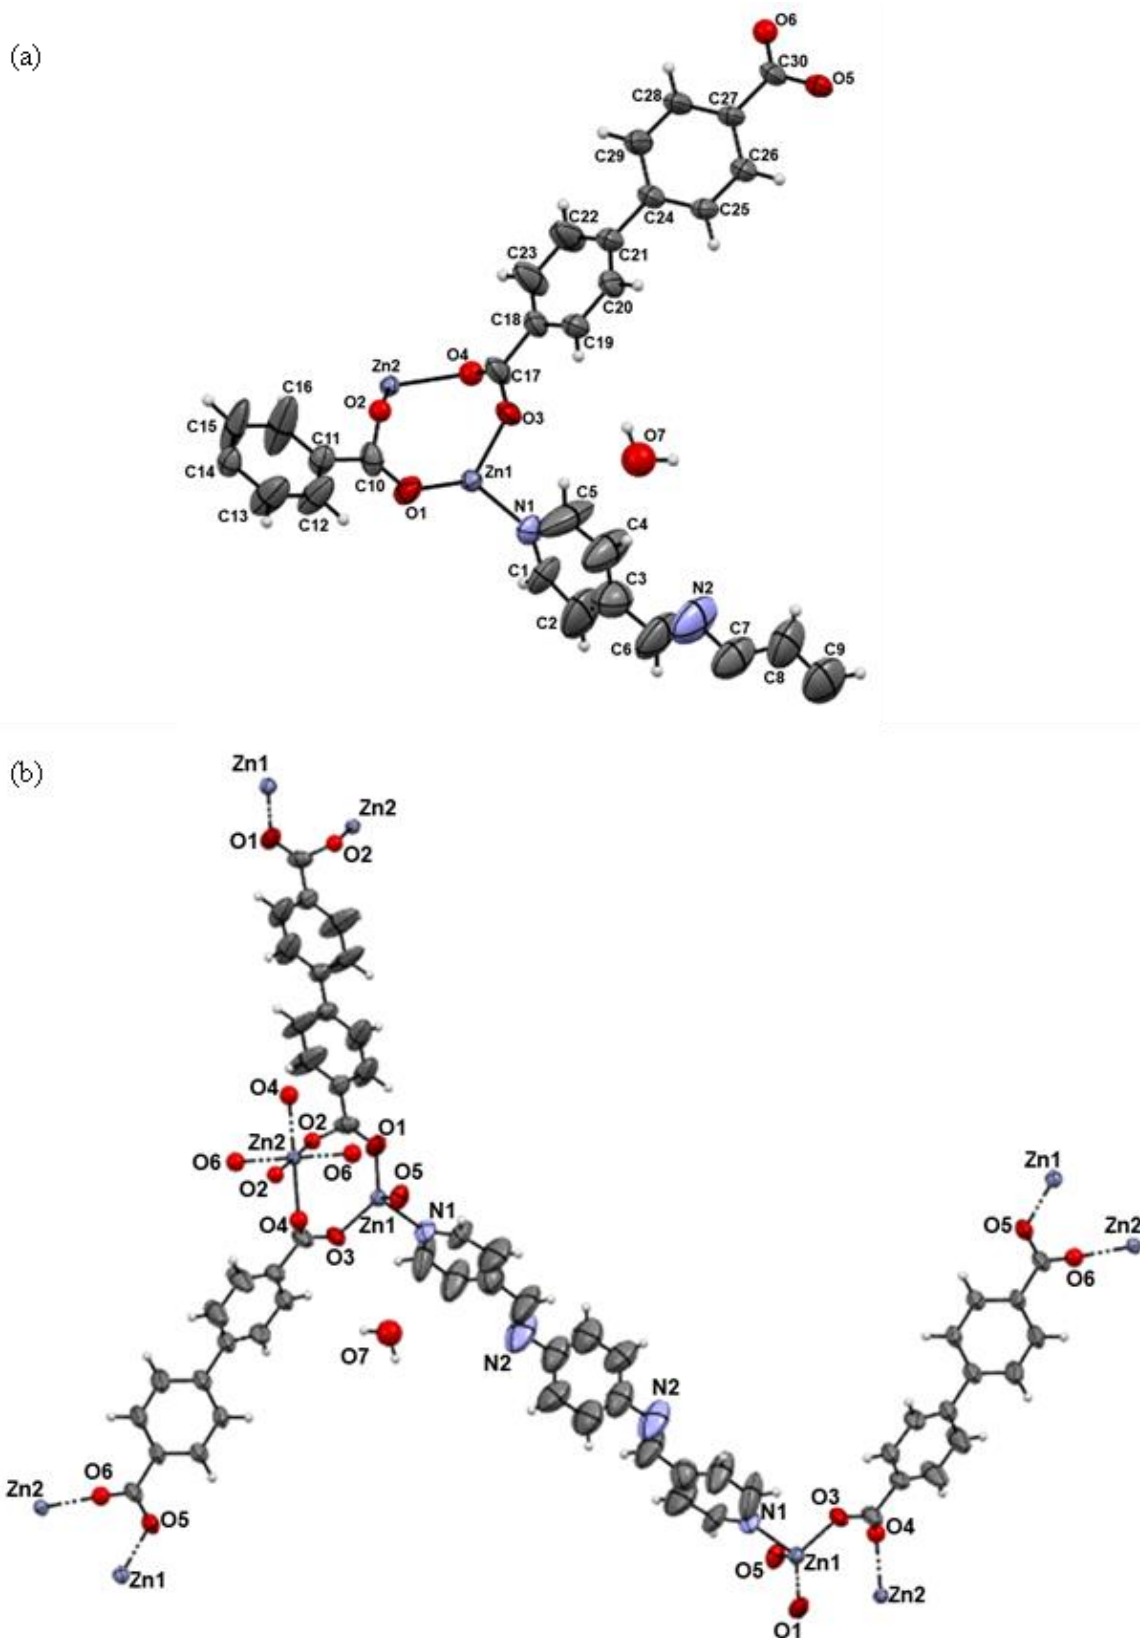

**Fig. S3** ORTEP of **Zn-MOF** to show the atom numbering scheme(a) Asymmetric unit and (b) Extended network; thermal ellipsoids shown at 50% probability.

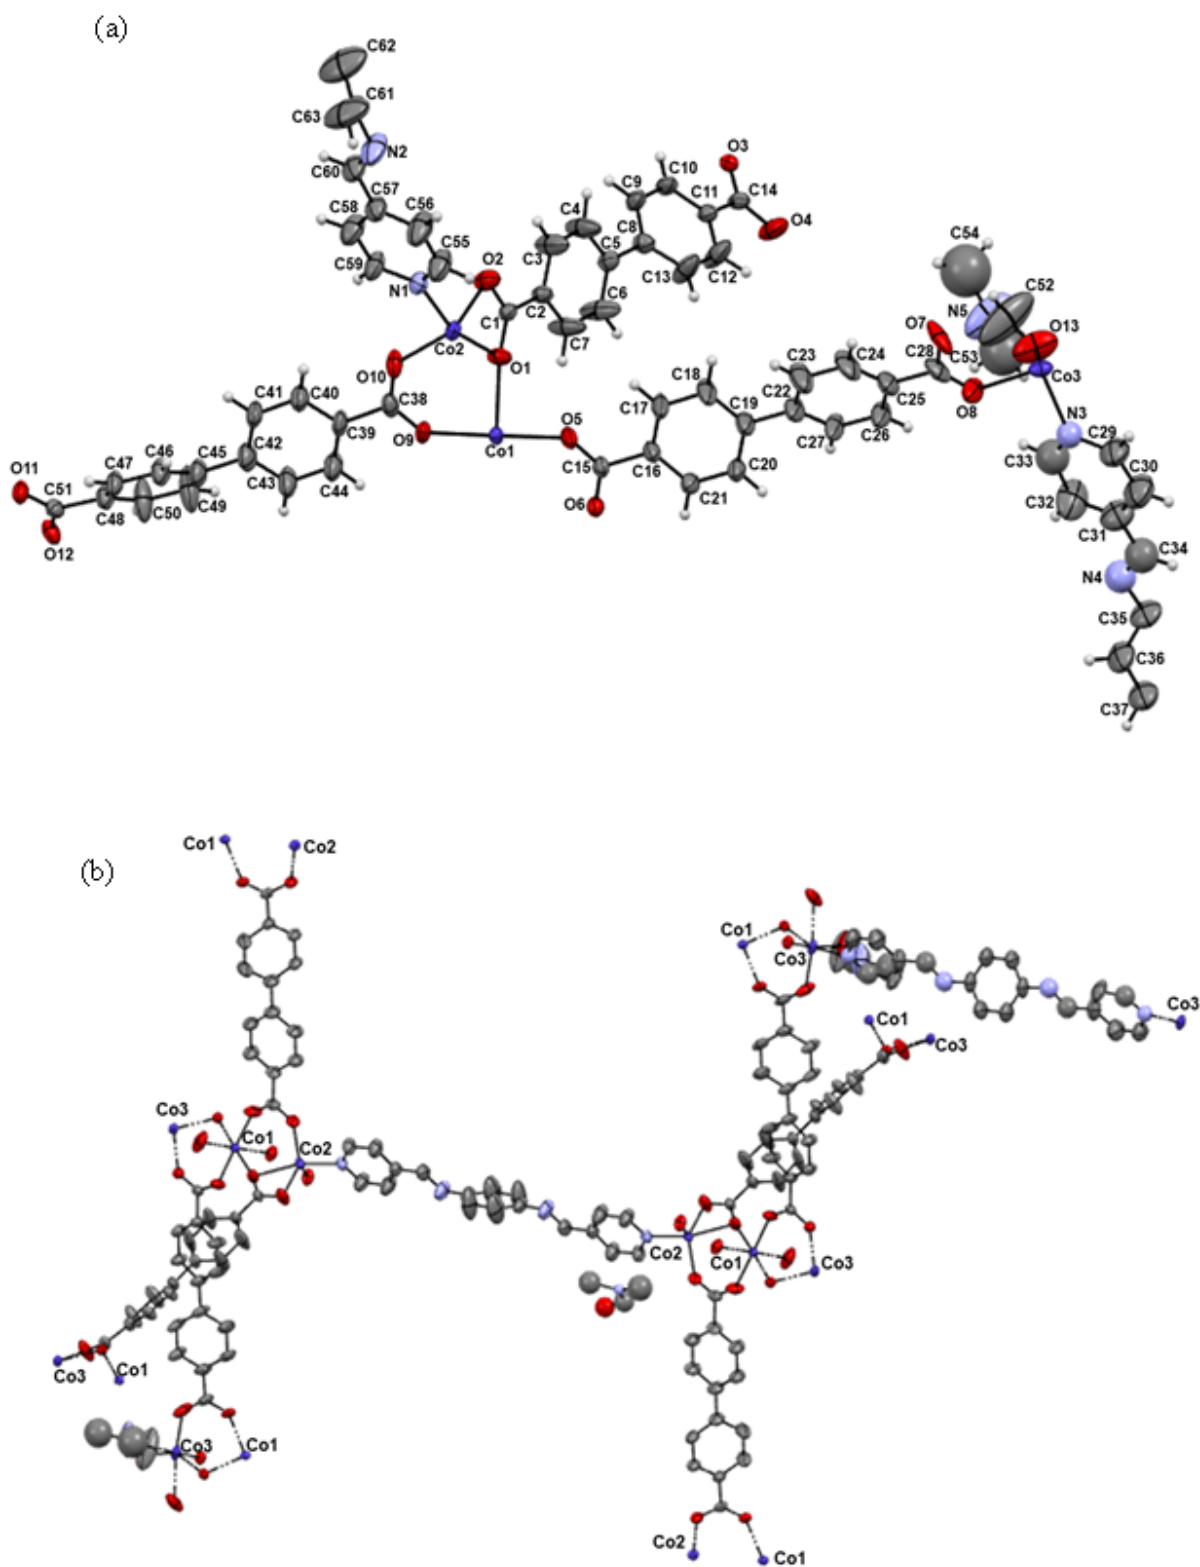

**Fig. S4** ORTEP of **Co-MOF** to show the atom numbering scheme: (a) Asymmetric unit (Solvated DMF is removed for clarity) (b) Extended network (Metal centres are labelled); thermal ellipsoids shown at 50% probability.

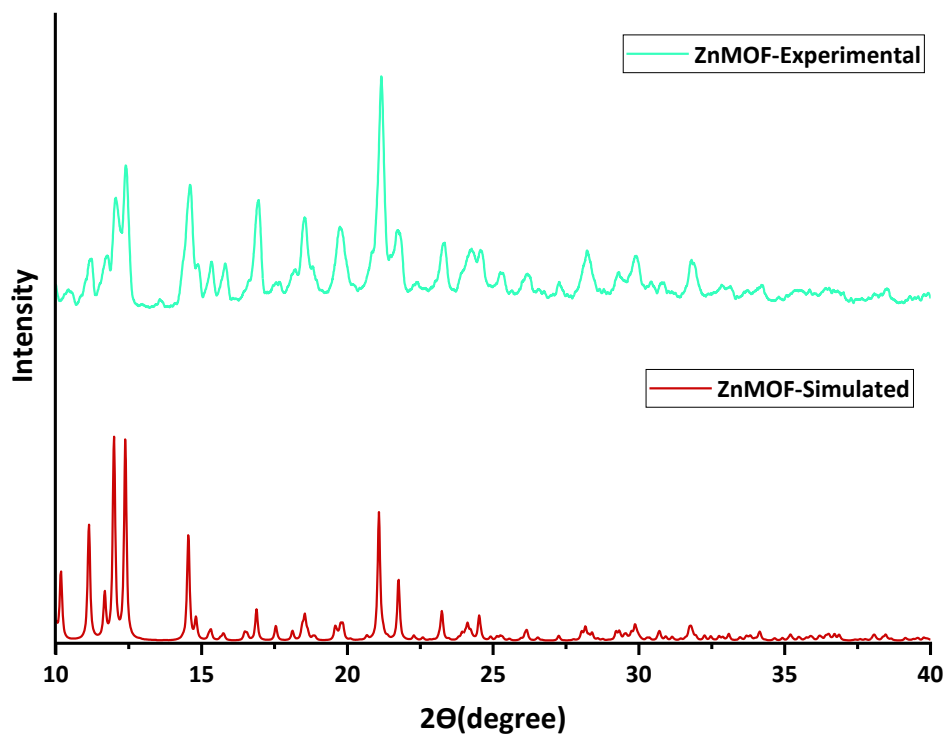

Fig. S5 Experimental and simulated PXR D patterns of **Zn-MOF**.

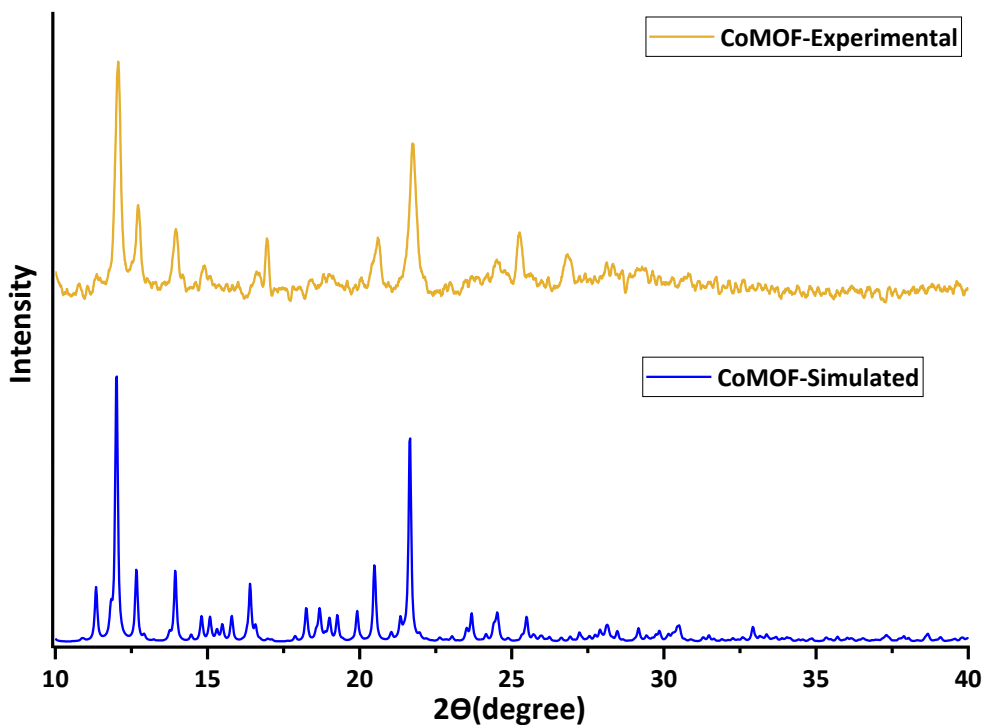

Fig. S6 Experimental and simulated PXR D patterns of **Co-MOF**.

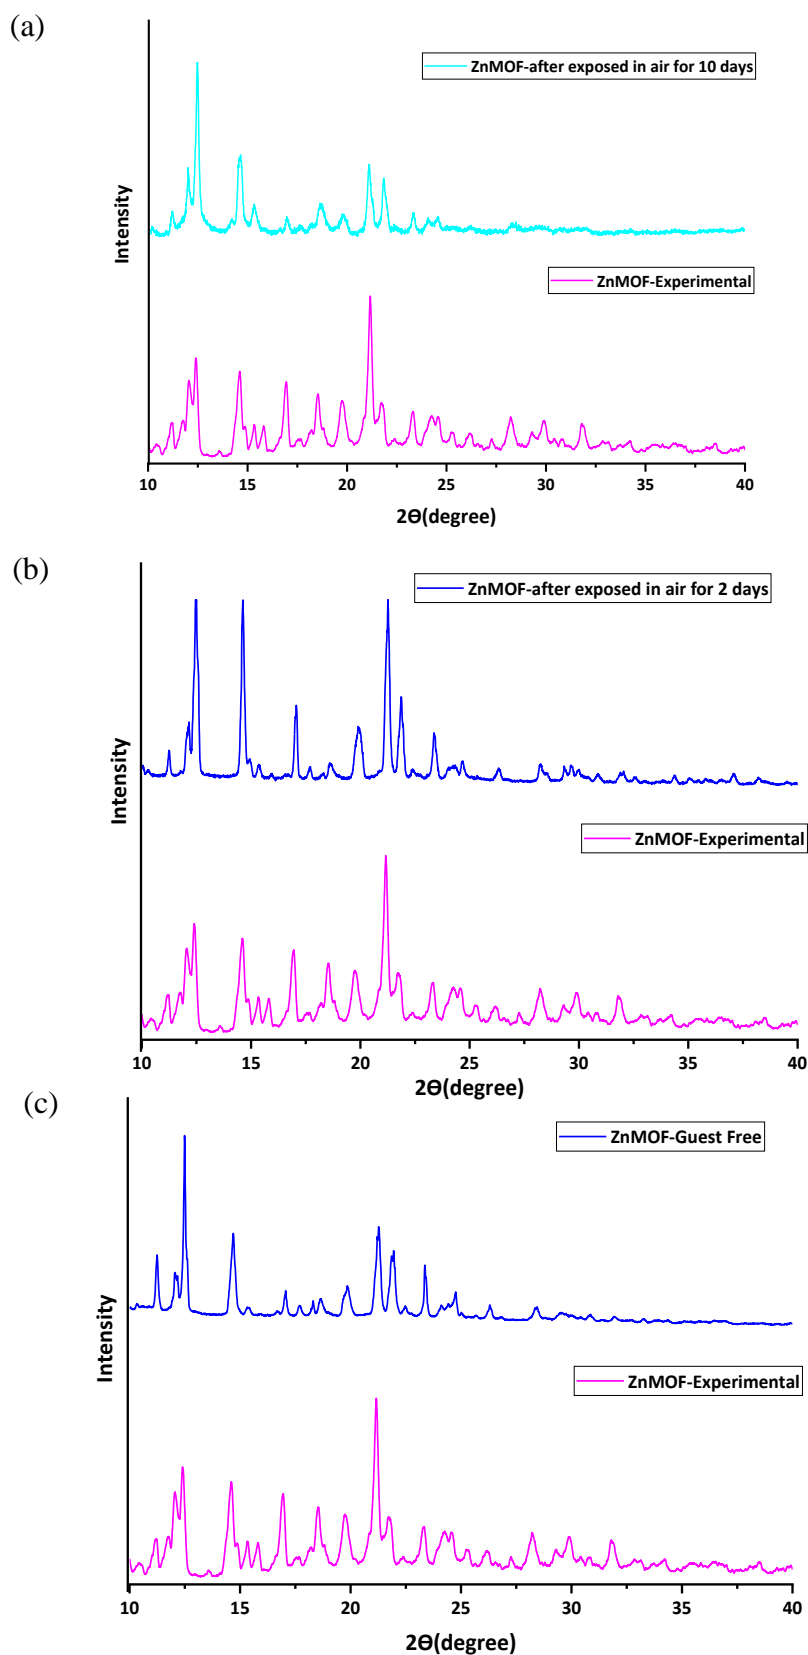

**Fig. S7** Experimental PXRD patterns of **Zn-MOF** (a) after exposing to air for 10 days, (b) after exposing to air for 2 days and (c) without guest molecules compared to that of as-synthesized **Zn-MOF**.

(a)

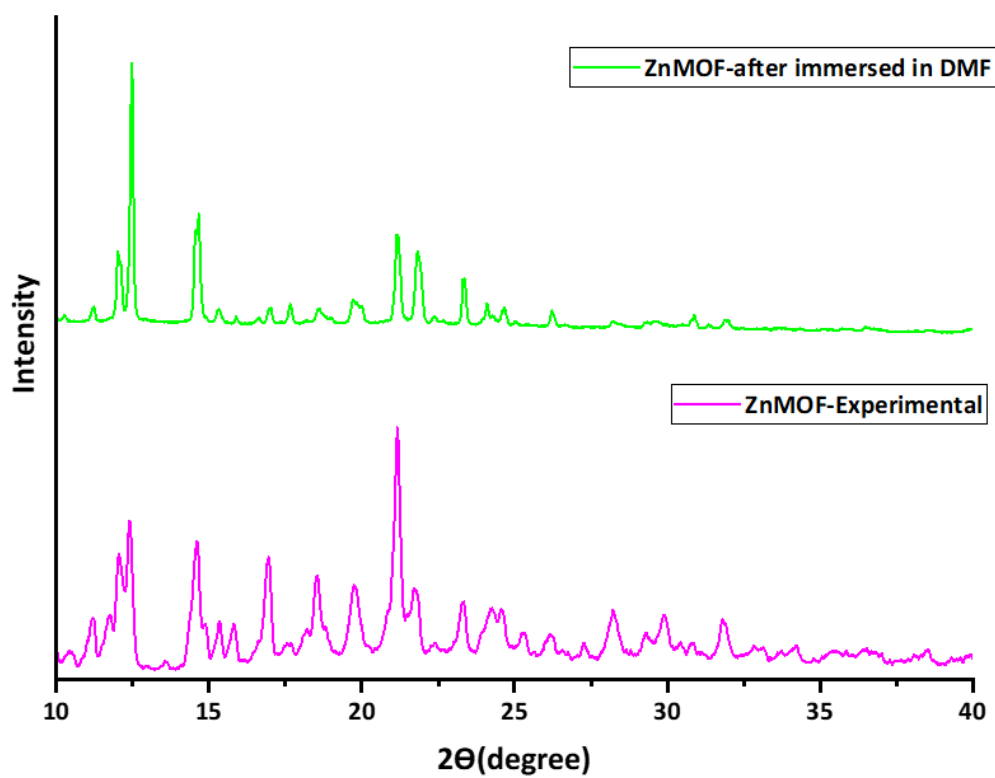

(b)

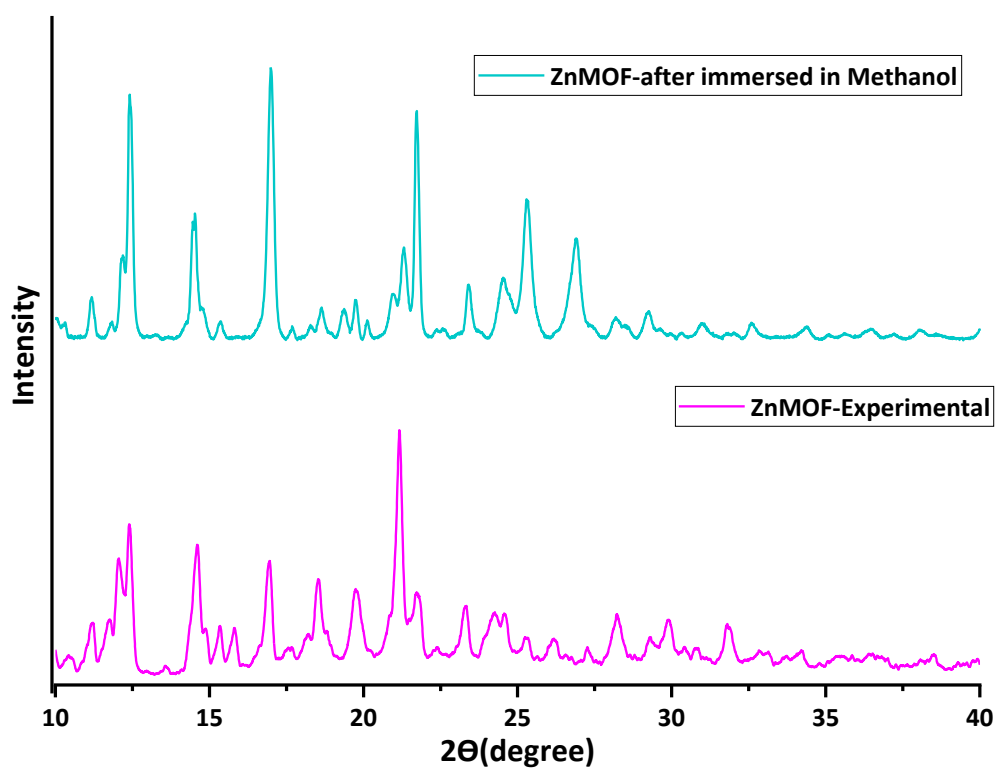

**Fig. S8** Experimental PXRD patterns of **Zn-MOF** (a) after immersing in DMF and (b) after immersing in MeOH compared to that of **Zn-MOF**.

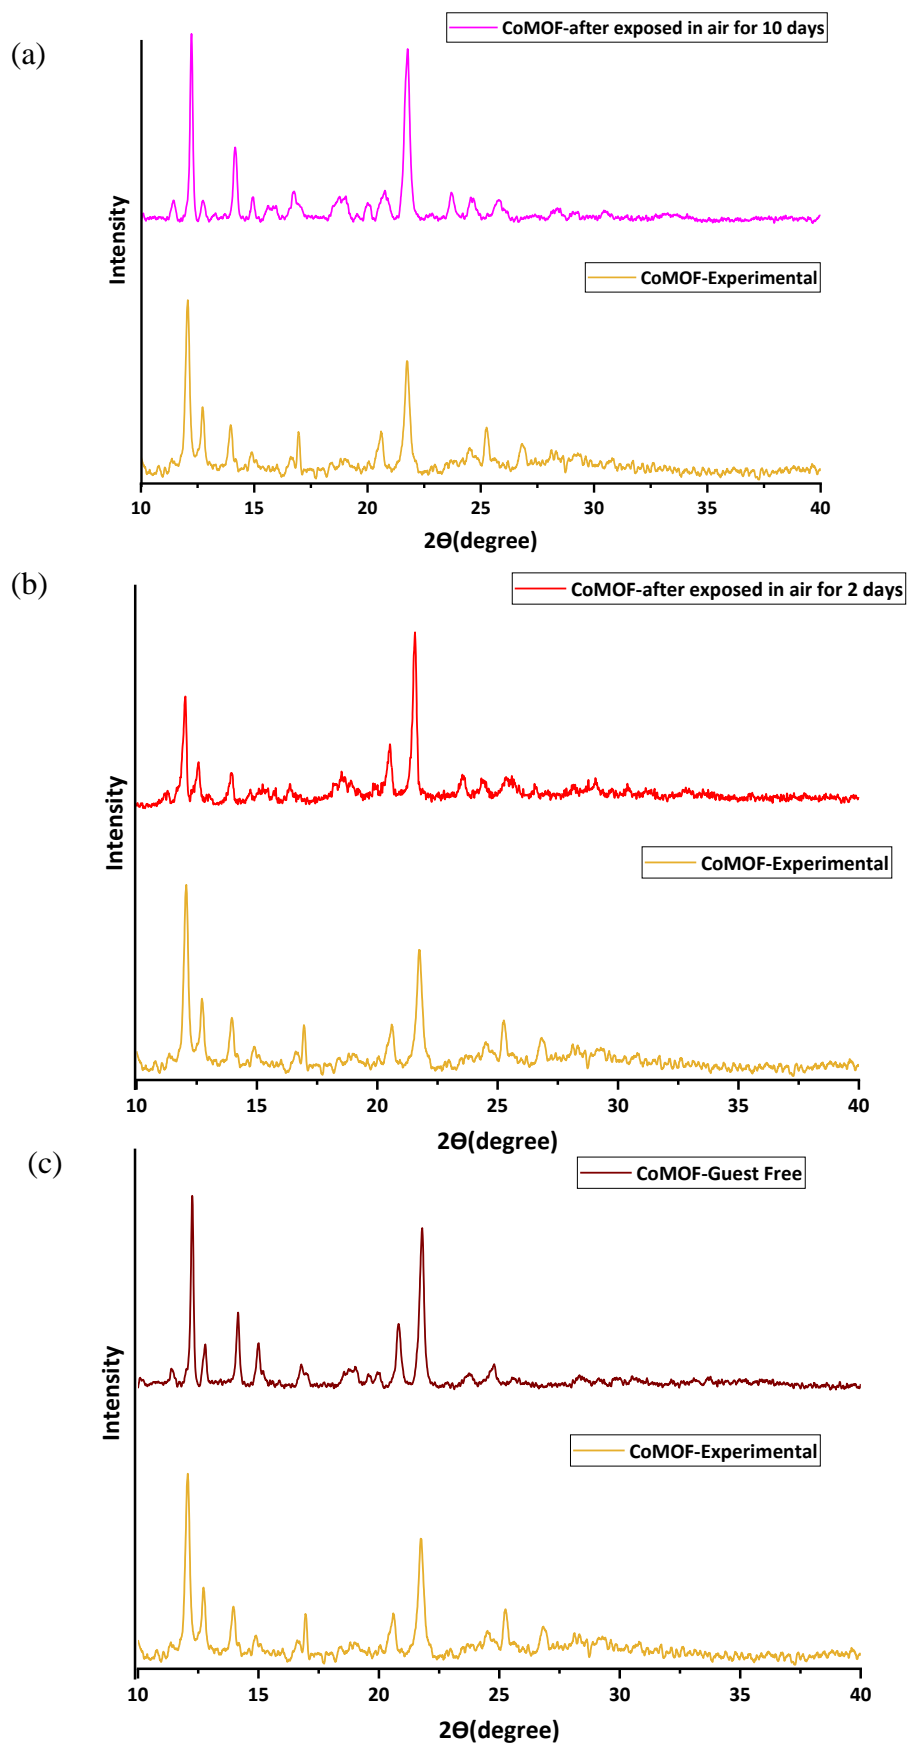

**Fig. S9** Experimental PXRD patterns of **Co-MOF** (a) after exposing to air for 10 days, (b) after exposing to air for 2 days and (c) without guest molecules compared to that of as-synthesized **Co-MOF**.



(a)

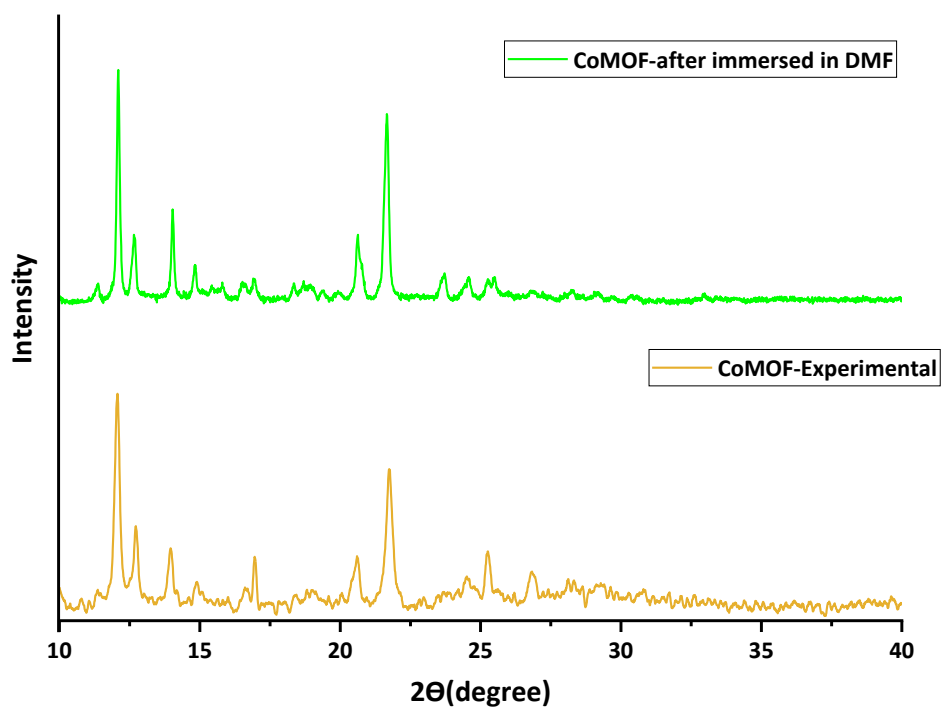

(b)

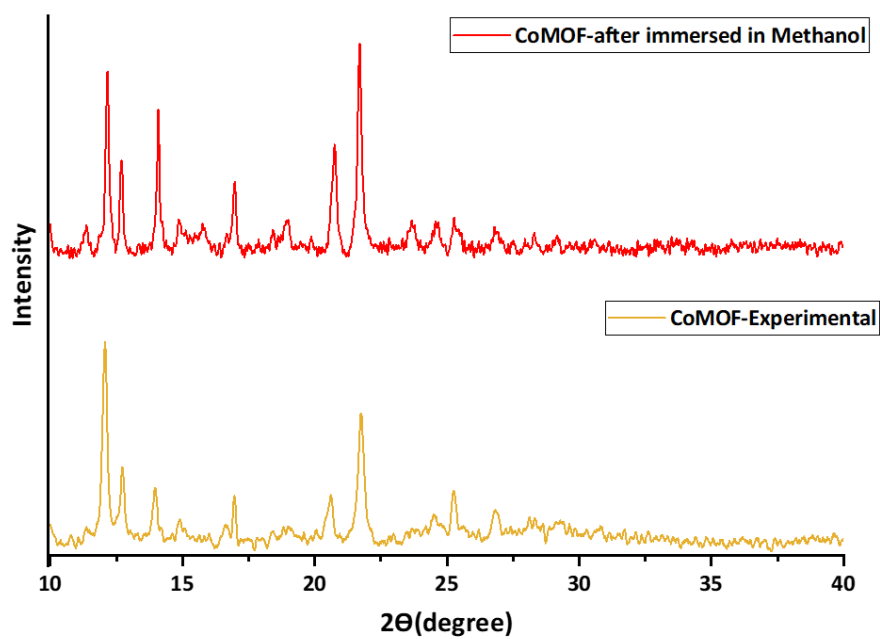

**Fig. S10** Experimental PXRD patterns of **Co-MOF** (a) after immersing in DMF and (b) after immersing in MeOH compared to that of **Co-MOF**.

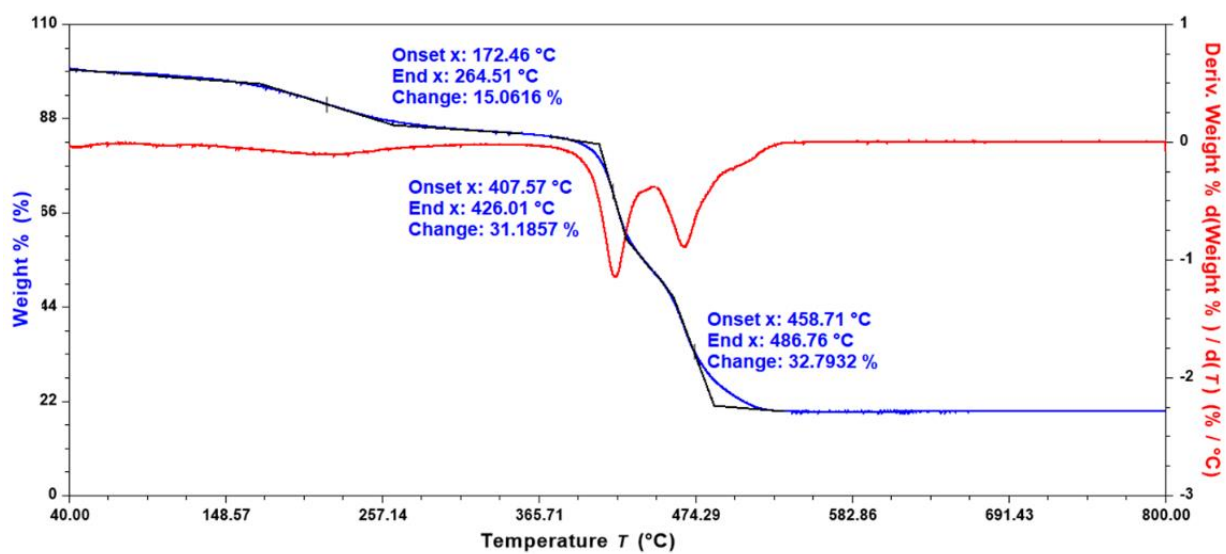

**Fig. S11** TGA and DTA of Zn-MOF.

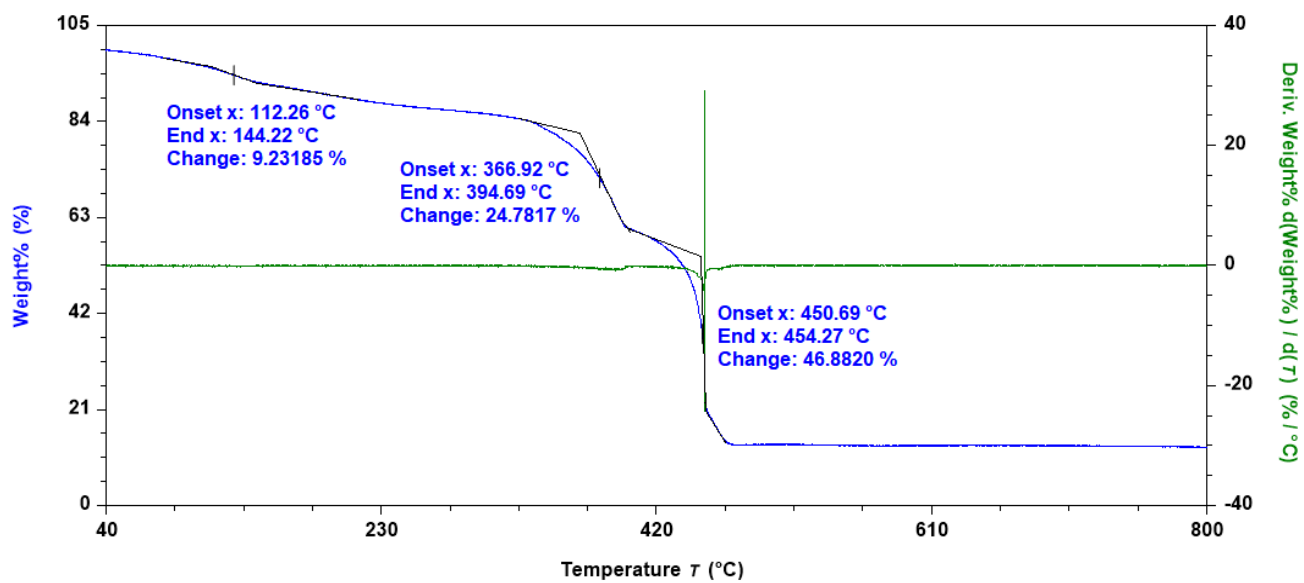

**Fig. S12.** TGA and DTA of Co-MOF.

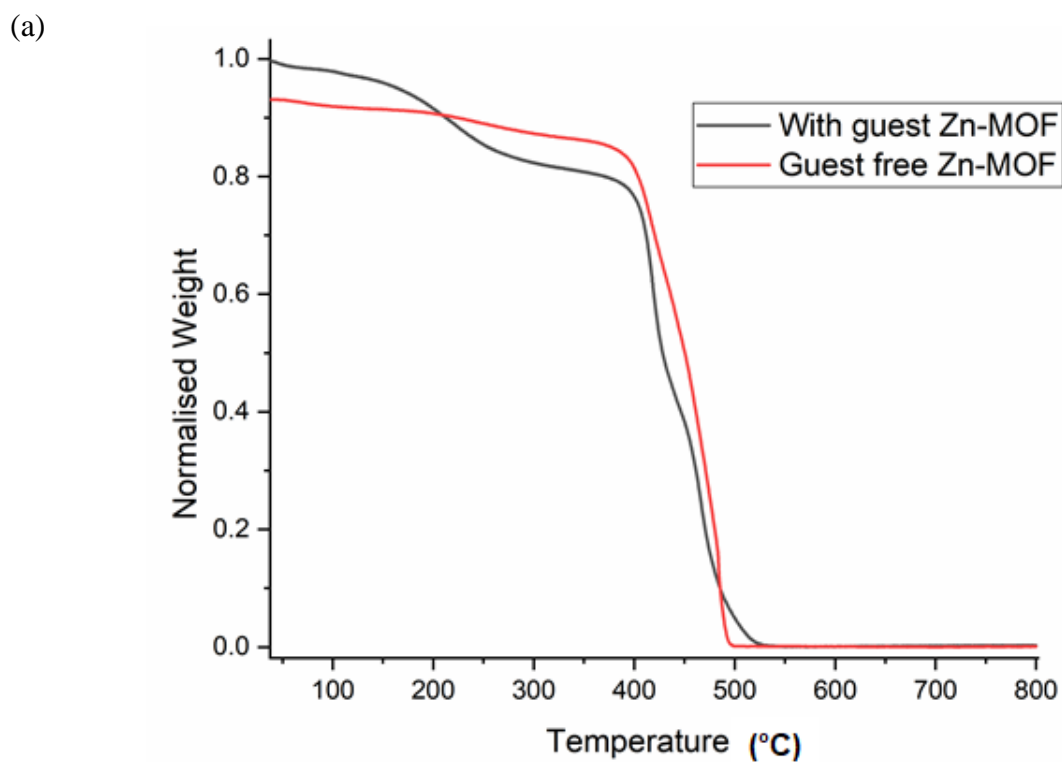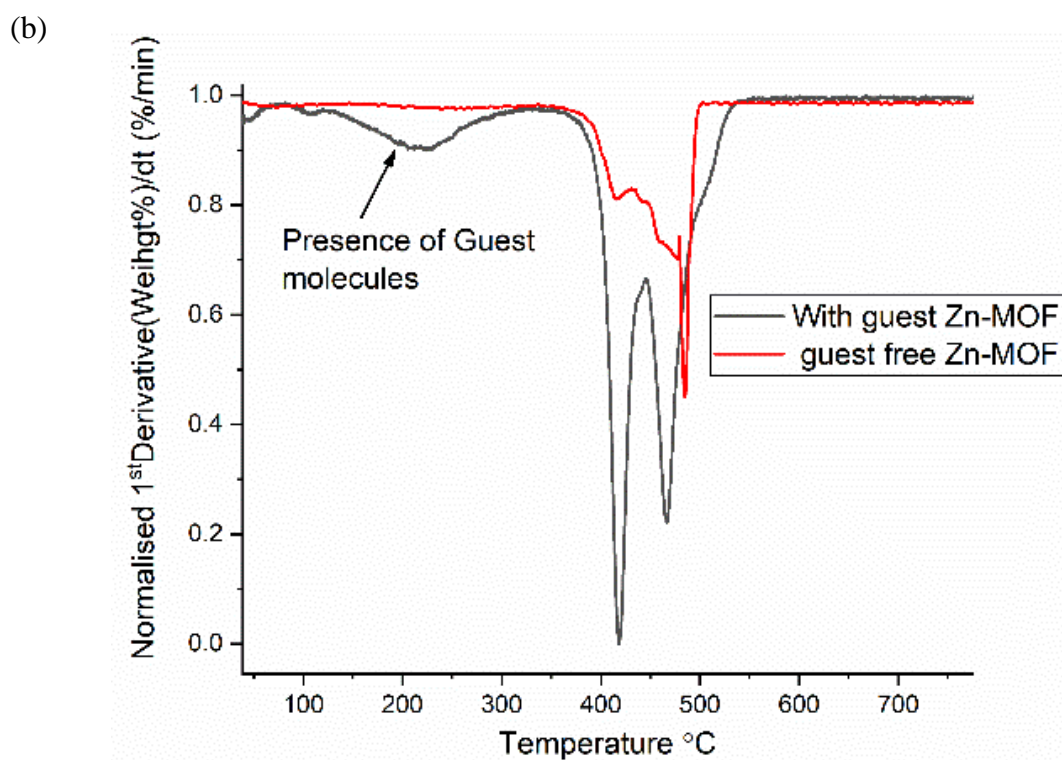

**Fig. S13** Overlay of (a) TGA and (b) DTA plots of **Zn-MOF** and **Zn-MOF** after removing guest molecules.

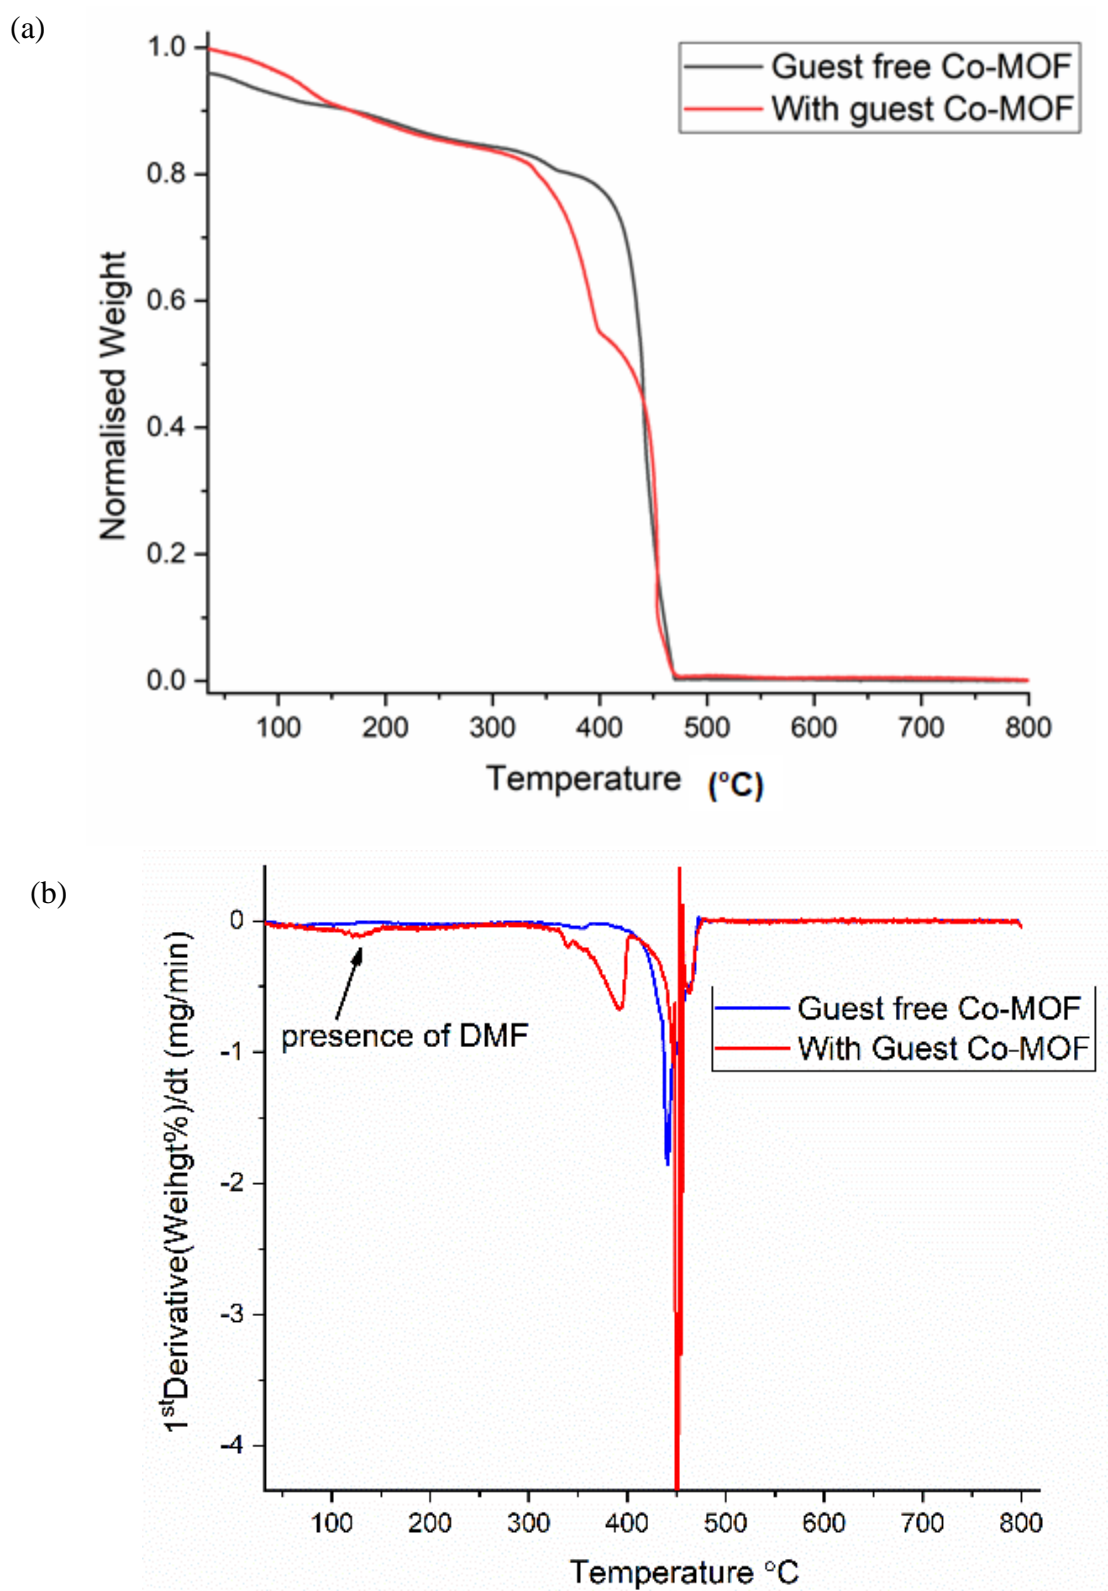

**Fig. S14** Overlay of (a) TGA and (b) DTA plots of **Co-MOF** and **Co-MOF** after removing guest molecules.

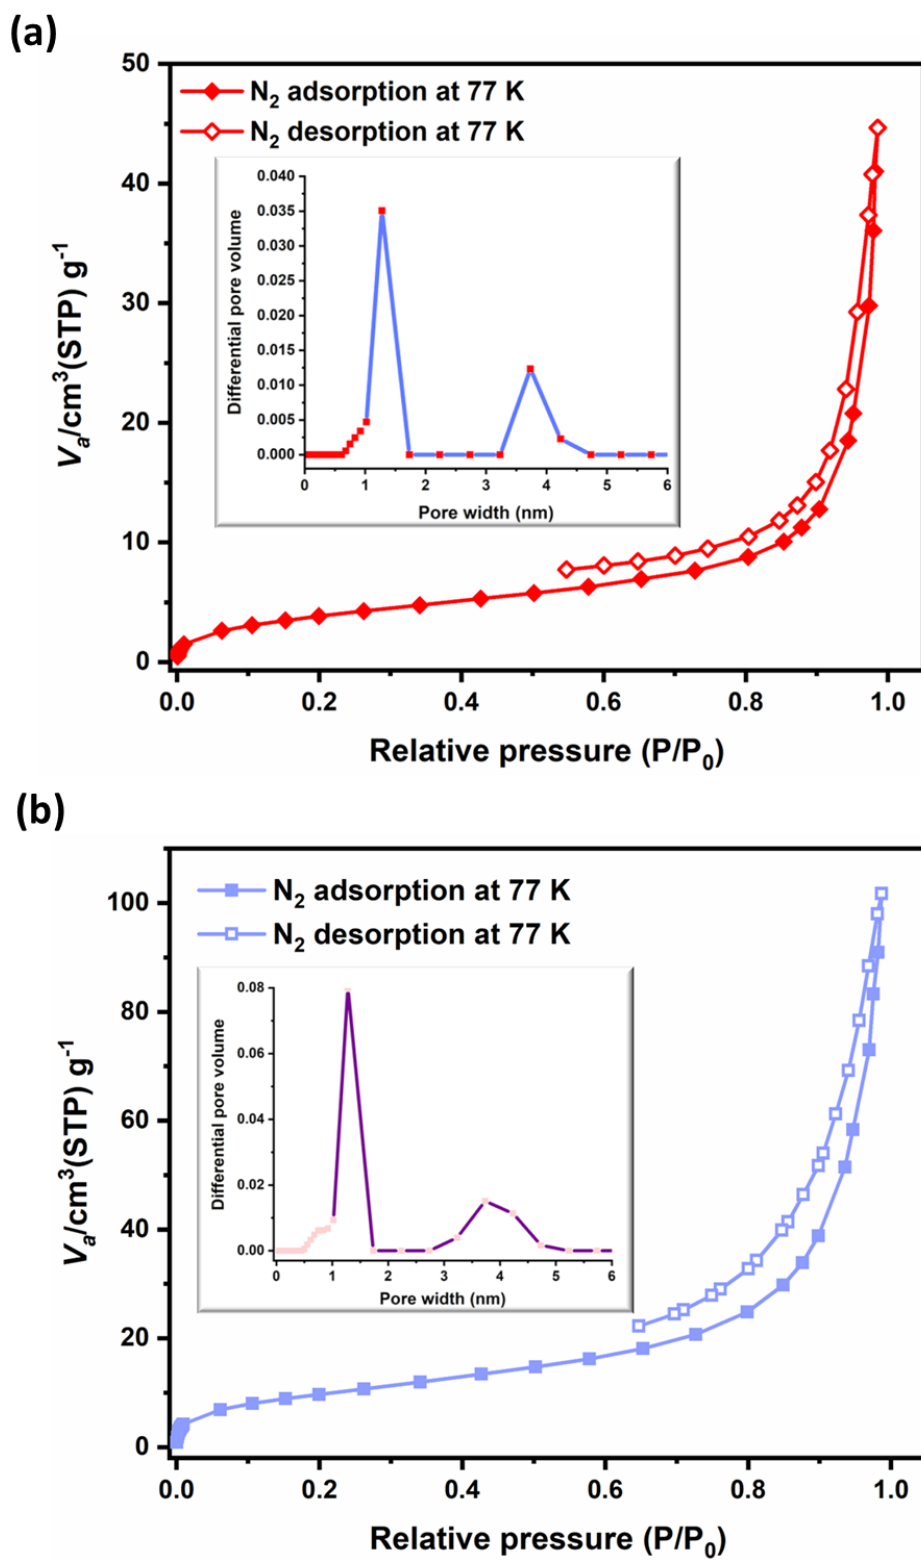

**Fig. S15** N<sub>2</sub> adsorption-desorption isotherms (Type II) at 77 K and 1 bar: (a) **Zn-MOF** and (b) **Co-MOF**; the insets in (a) and (b) are pore size distribution of **Zn-MOF** and **Co-MOF**, respectively.

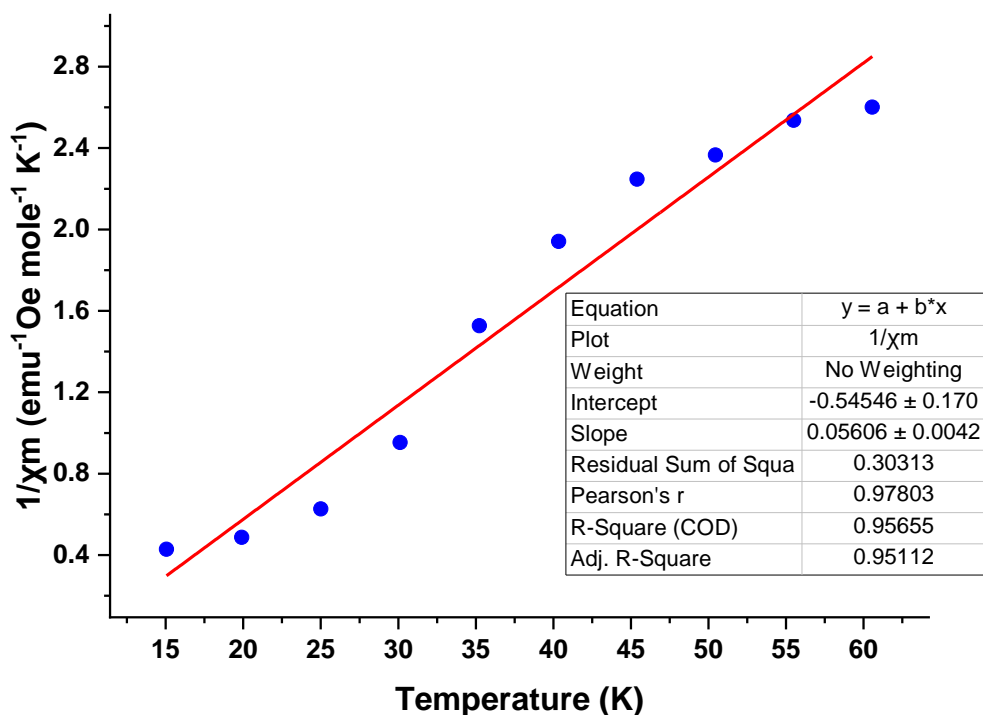

**Fig. S16**  $1/\chi_m$  vs T plot at low temperature for Co-MOF (Weiss constant: -5.04K).

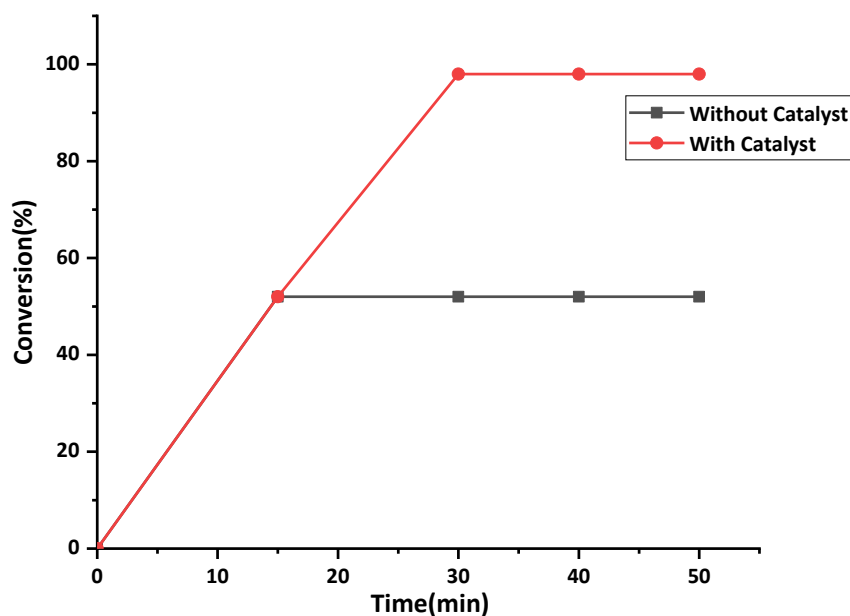

**Fig. S17** Hot filtration test for the Knoevenagel condensation reaction of Malononitrile with benzaldehyde with Zn-MOF as catalyst and without catalyst (Reaction Condition: Substrate (0.5mmol), Malononitrile (0.65 mmol), Zn-MOF (catalyst) amount 5 mg ( $4.094 \times 10^{-4}$  mmol), MeOH (0.5 mL), Temperature (78 °C)).

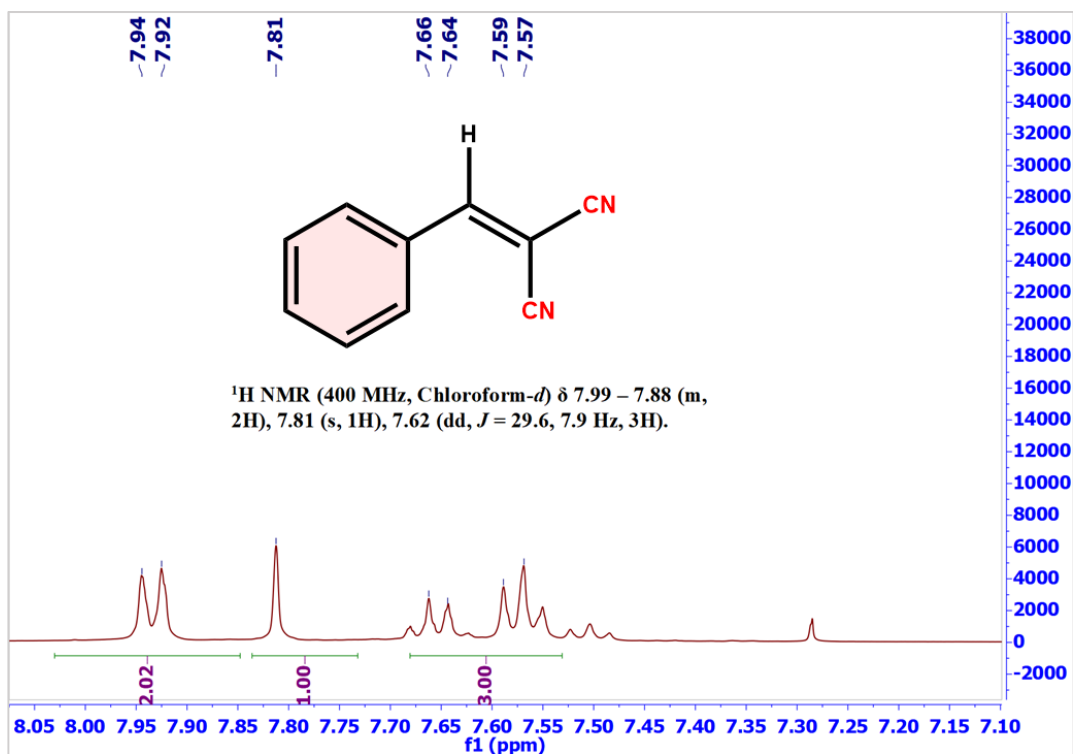

Fig. S18 <sup>1</sup>H NMR spectrum of 2-benzylidenemalononitrile.

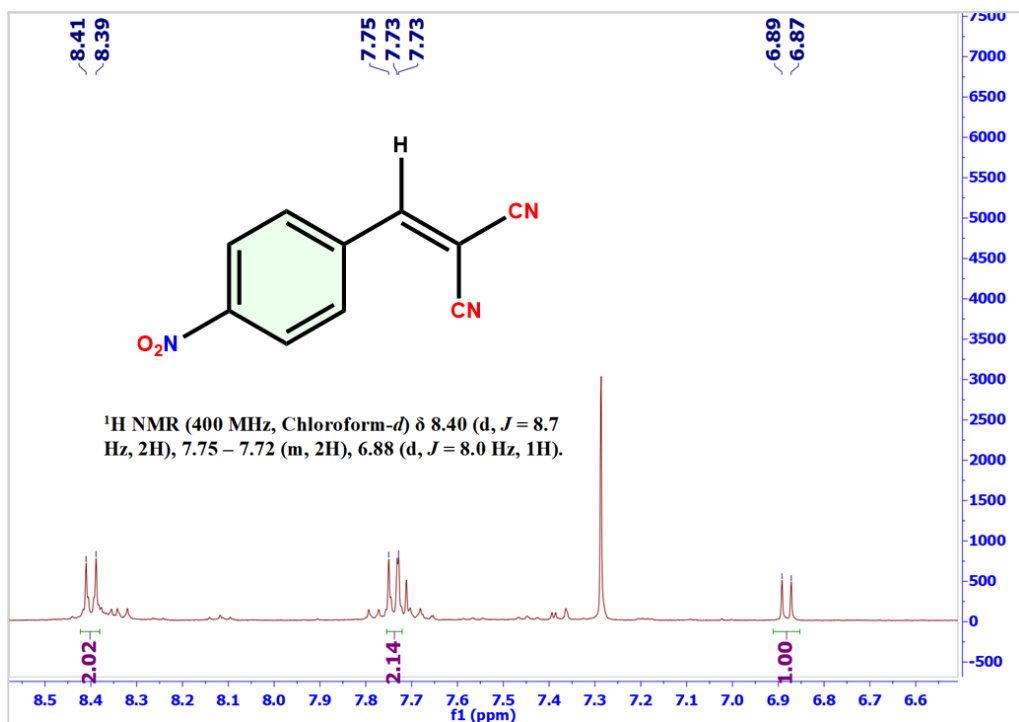

Fig. S19 <sup>1</sup>H NMR spectrum of 2-(4-nitrobenzylidene)malononitrile.

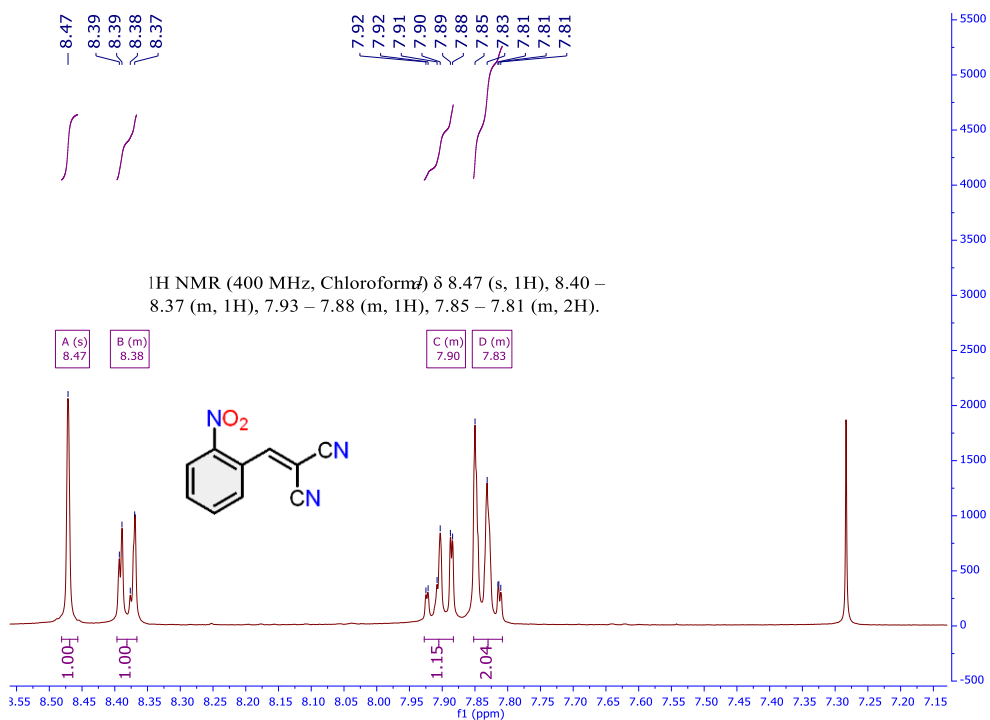

**Fig. S20**  $^1\text{H NMR}$  spectrum of 2-(2-nitrobenzylidene)malononitrile.

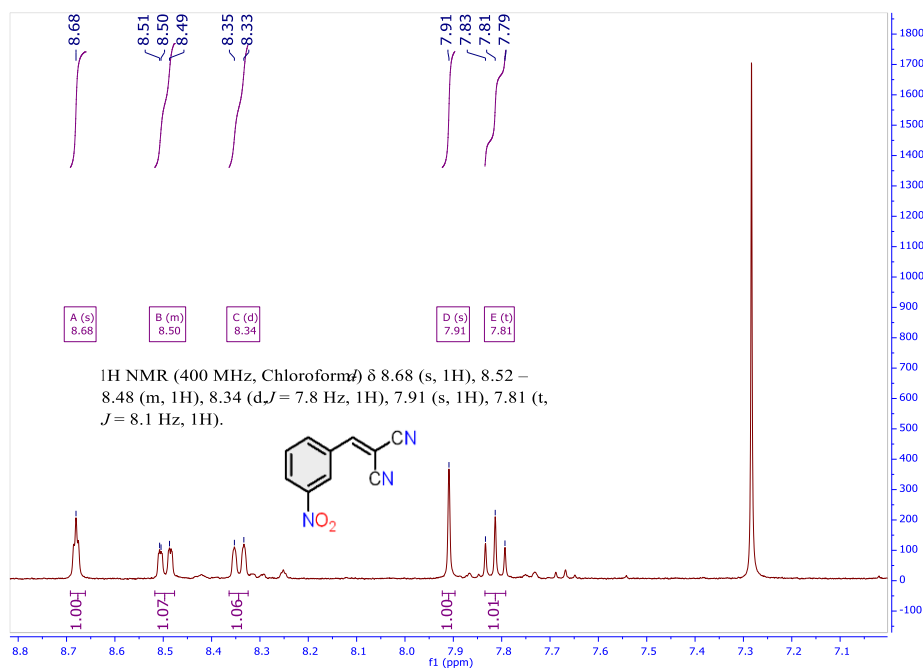

**Fig. S21**  $^1\text{H NMR}$  spectrum of 2-(3-nitrobenzylidene)malononitrile.



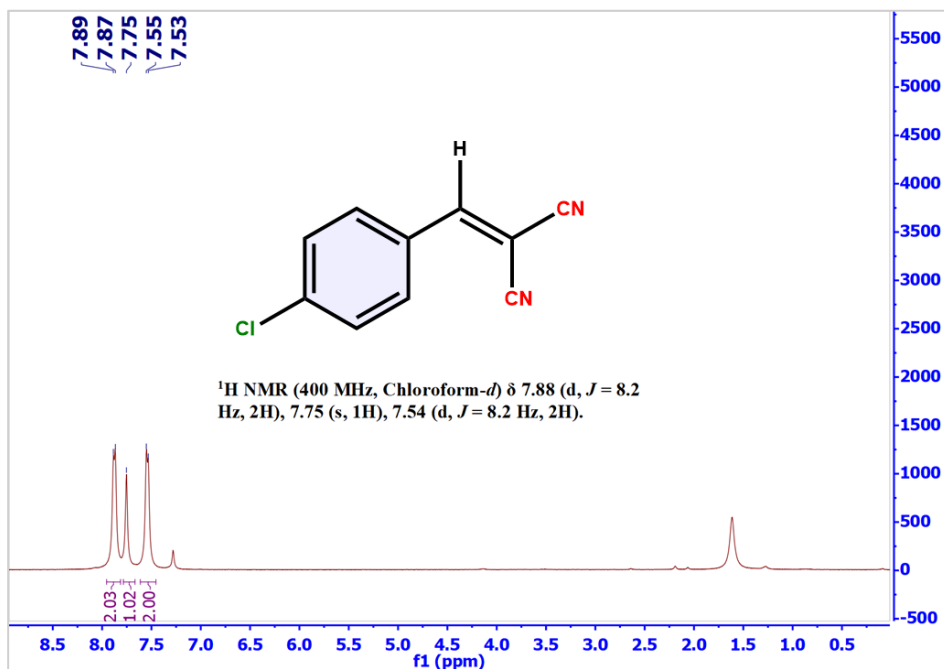

**Fig. S22**  $^1\text{H NMR}$  spectrum of 2-(4-chlorobenzylidene)malononitrile

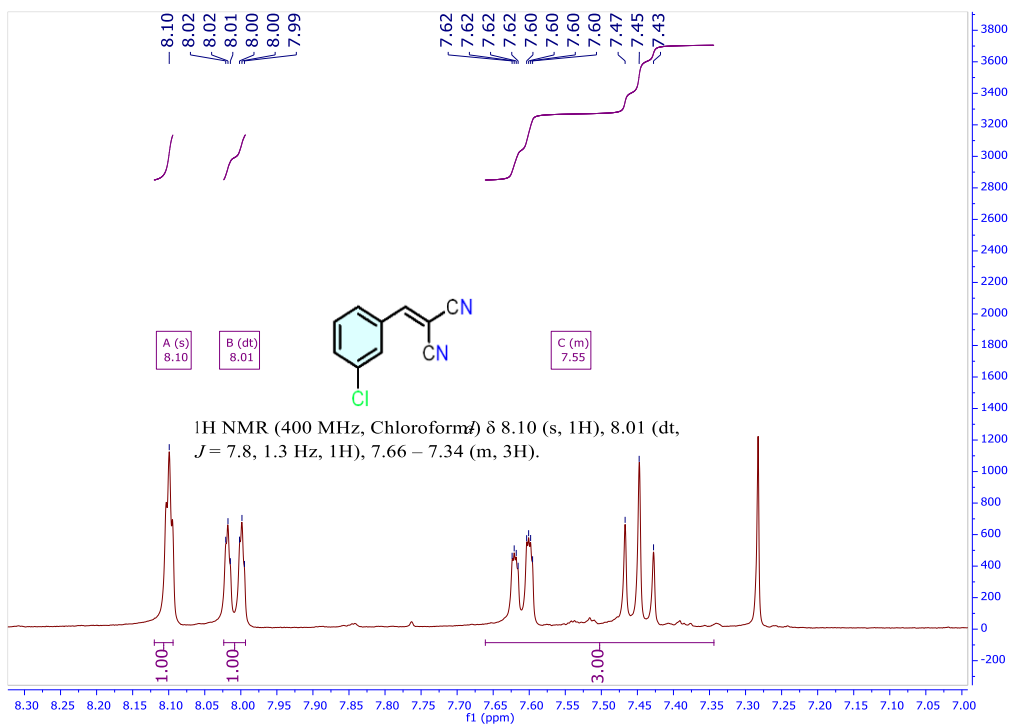

**Fig. S23**  $^1\text{H NMR}$  spectrum of 2-(3-chlorobenzylidene)malononitrile.

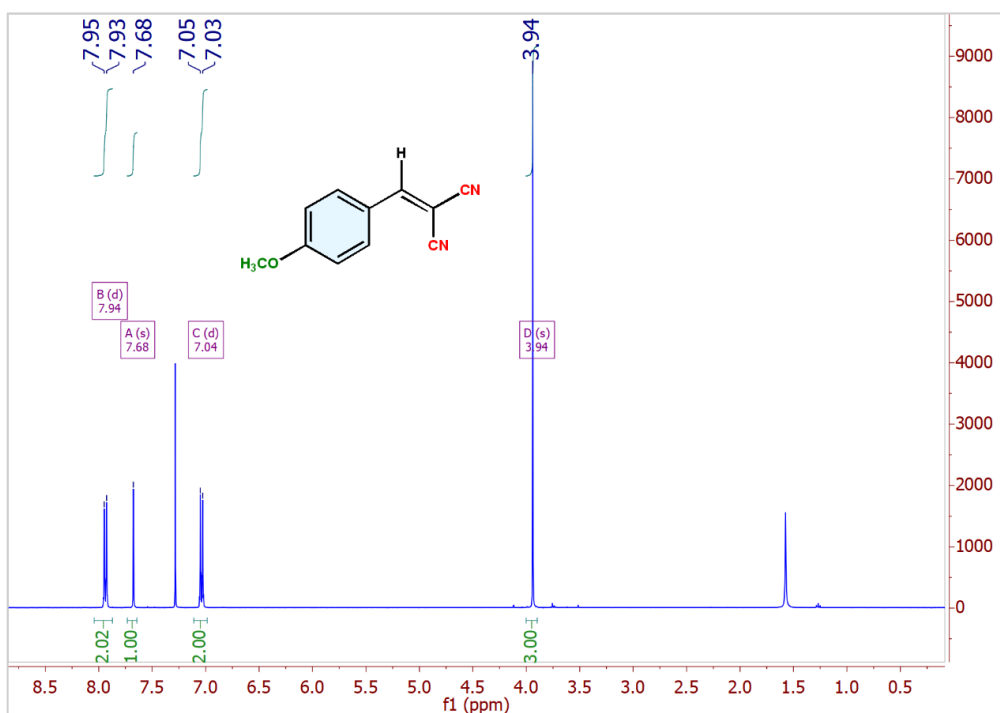

**Fig. S24**  $^1\text{H}$  NMR spectrum of 2-(4-methoxybenzylidene)malononitrile.

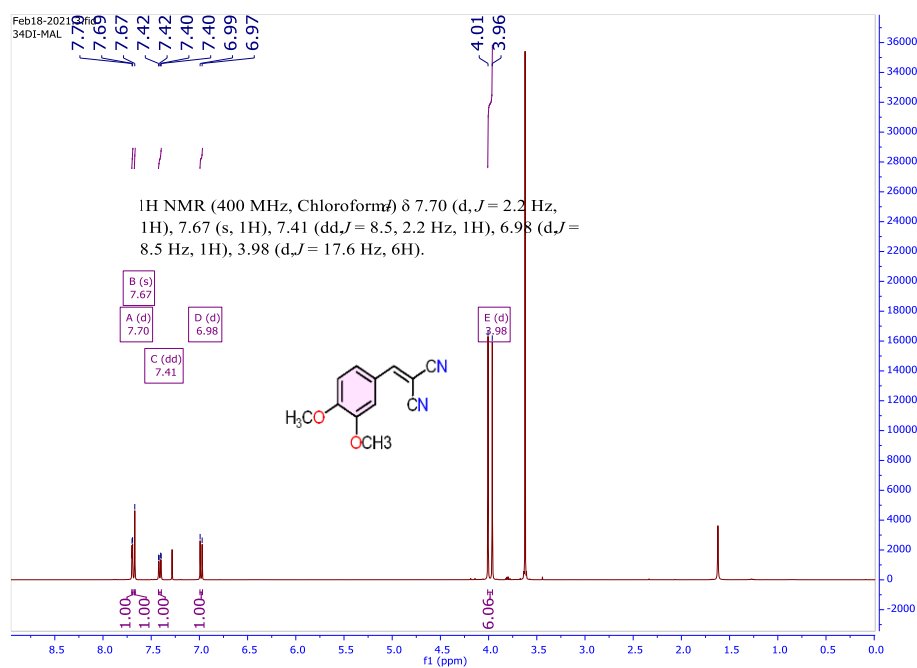

**Fig. S25**  $^1\text{H}$  NMR spectrum of 2-(3,4-dimethoxybenzylidene)malononitrile.

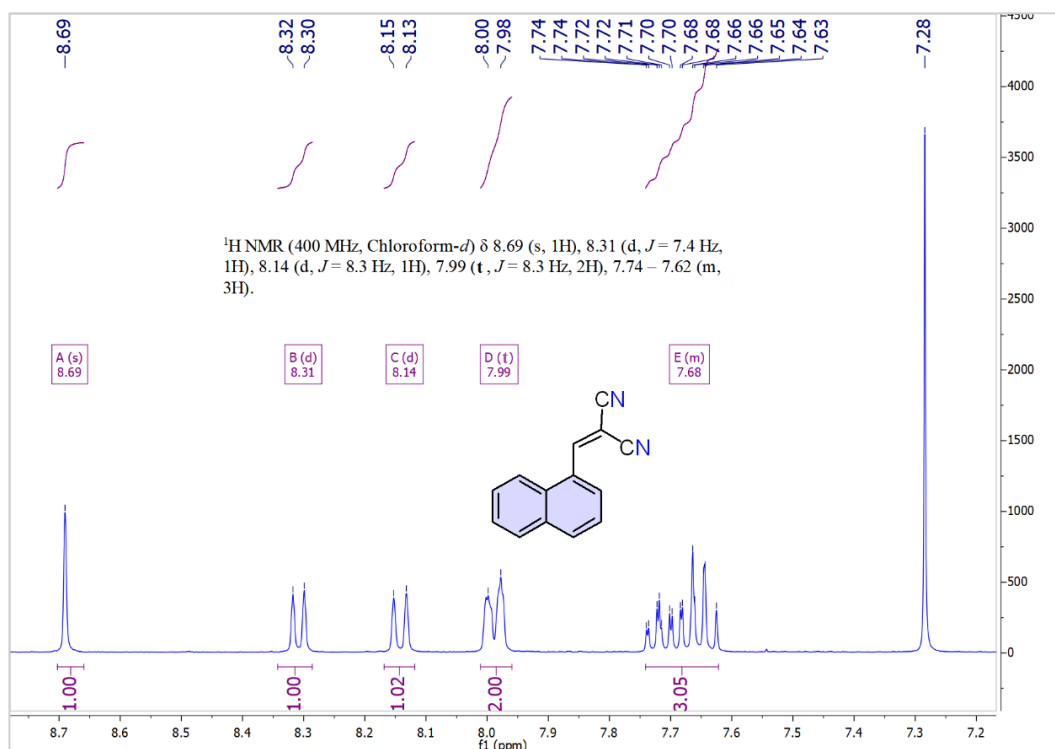

**Fig. S26** <sup>1</sup>H NMR spectrum of 2-(naphthalen-1-ylmethylene)malononitrile.

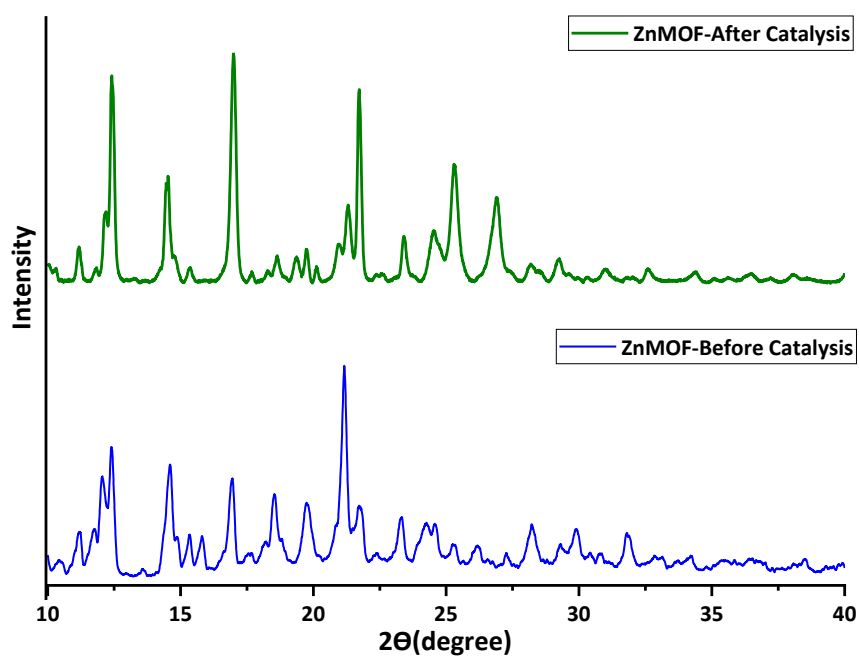

**Fig. S27** PXRD patterns of Zn-MOF before and after catalysis.

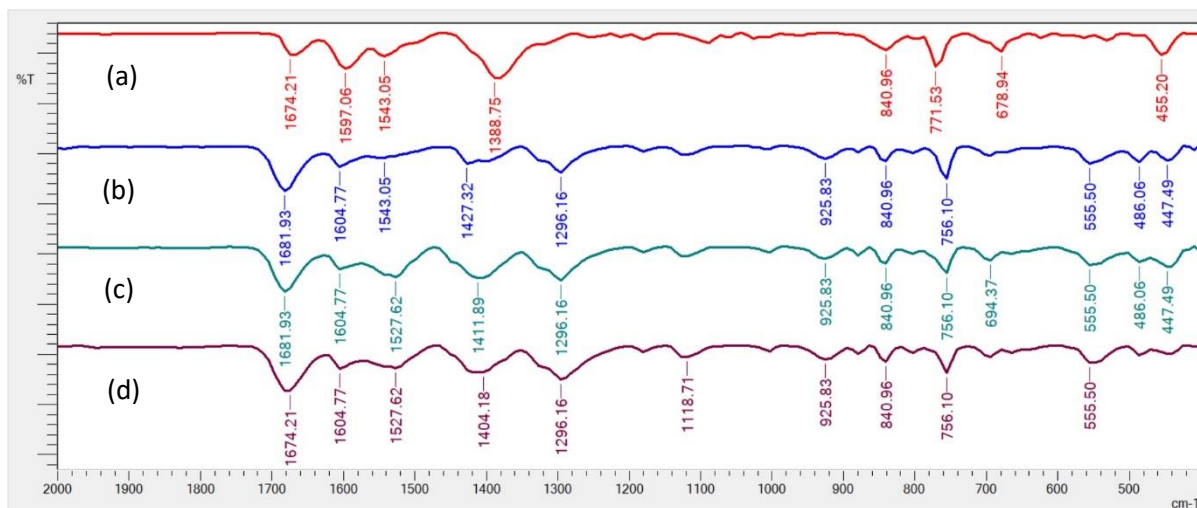

**Fig. S28** Stacked FTIR spectra to compare the structural integrity of **Zn-MOF** (a) before catalysis, (b) after first cycle catalysis; (c) after second cycle catalysis; (d) after third cycle catalysis (For the reaction involving benzaldehyde with malononitrile).

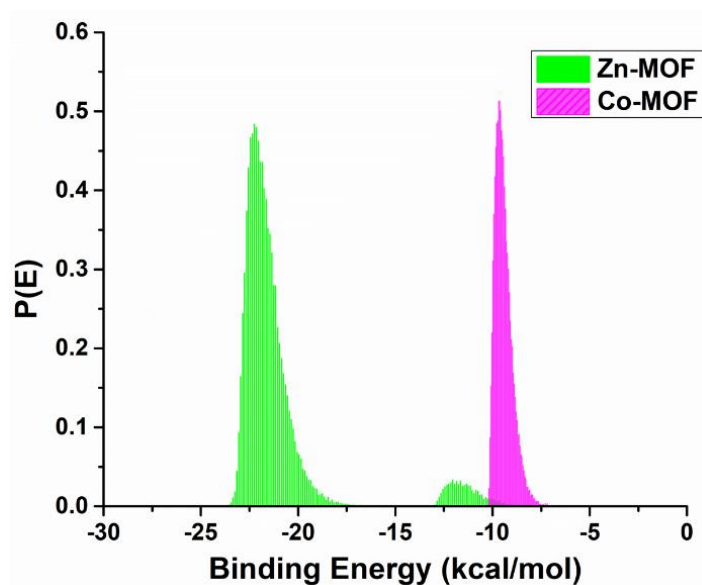

**Fig. S29** Binding energy of benzaldehyde with **Zn-MOF** and **Co-MOF**.

**Table S1.** Selected bond distances of **Zn-MOF** involving the Zn centers (see Figure S3 for atom labels)

| <b>Atom1</b> | <b>Atom2</b> | <b>Length</b> |
|--------------|--------------|---------------|
| Zn1          | O1           | 1.942(7)      |
| Zn1          | O3           | 1.932(8)      |
| Zn1          | N1           | 2.046(9)      |
| Zn1          | O5           | 1.940(8)      |
| Zn2          | O2           | 2.09          |
| Zn2          | O4           | 2.06          |
| Zn2          | O6           | 2.08          |

**Table S2.** Selected bond distances of **Co-MOF** involving the Co centers (see Figure S4 for atom labels)

| <b>Atom1</b> | <b>Atom2</b> | <b>Length</b> |
|--------------|--------------|---------------|
| Co1          | O1           | 2.110(5)      |
| Co1          | O5           | 2.029(5)      |
| Co1          | O9           | 2.049(5)      |
| Co1          | O3           | 2.112(4)      |
| Co1          | O7           | 2.037(5)      |
| Co1          | O12          | 2.076(4)      |
| Co2          | O1           | 2.261(5)      |
| Co2          | O2           | 2.020(4)      |
| Co2          | O10          | 1.955(5)      |
| Co2          | N1           | 2.068(6)      |
| Co2          | O11          | 1.960(4)      |
| Co3          | O8           | 1.977(6)      |
| Co3          | O13          | 2.143(8)      |
| Co3          | N3           | 2.109(9)      |
| Co3          | O3           | 2.134(5)      |
| Co3          | O4           | 2.238(6)      |
| Co3          | O6           | 2.017(4)      |

**Table S3.** Optimization table for the Knoevenagel condensation reaction between Malanonitrile and Benzaldehyde

| Entry | Catalyst      | Catalyst Amount (mg) | Solvent           | Time   | Temperature | Percentage Conversion <sup>a</sup> |
|-------|---------------|----------------------|-------------------|--------|-------------|------------------------------------|
| 1     | Catalyst free |                      | MeOH              | 24 h   | 78 °C       | 27                                 |
| 2     | <b>Zn-MOF</b> | 5 mg                 | CHCl <sub>3</sub> | 6 h    | 65 °C       | traces                             |
| 3     | <b>Zn-MOF</b> | 5 mg                 | THF               | 4 h    | 50 °C       | traces                             |
| 4     | <b>Zn-MOF</b> | 5 mg                 | THF               | 4 h    | 65 °C       | 40                                 |
| 5     | <b>Zn-MOF</b> | 5 mg                 | Acetonitrile      | 6 h    | 80 °C       | traces                             |
| 6     | <b>Zn-MOF</b> | 5 mg                 | MeOH              | 1 h    | 50 °C       | 35                                 |
| 7     | <b>Zn-MOF</b> | 5 mg                 | MeOH              | 30 min | 78 °C       | 98                                 |
| 8     | <b>Zn-MOF</b> | 10 mg                | MeOH              | 30 min | 78 °C       | 98                                 |
| 9     | <b>Zn-MOF</b> | 5 mg                 | Ethylacetate      | 1 h    | 70 °C       | 64                                 |
| 10    | <b>Zn-MOF</b> | 5 mg                 | DCM               | 2 h    | 35 °C       | 19                                 |
| 11    | <b>Co-MOF</b> | 5 mg                 | MeOH              | 45 min | 78 °C       | 65                                 |

<sup>a</sup>Conversion (%) was determined from GC
